# Supplementary material for: agr Genotyping and Biofilm Formation in Staphylococci Isolated From Clinical Specimens
Source: Research Square preprint supplement (doi:10.21203/rs.3.rs-8630905/v1), 2026-01-22
Supplement: Supplementary file 1 [file fa4dd06e43fbee727a7a3c3d.docx]

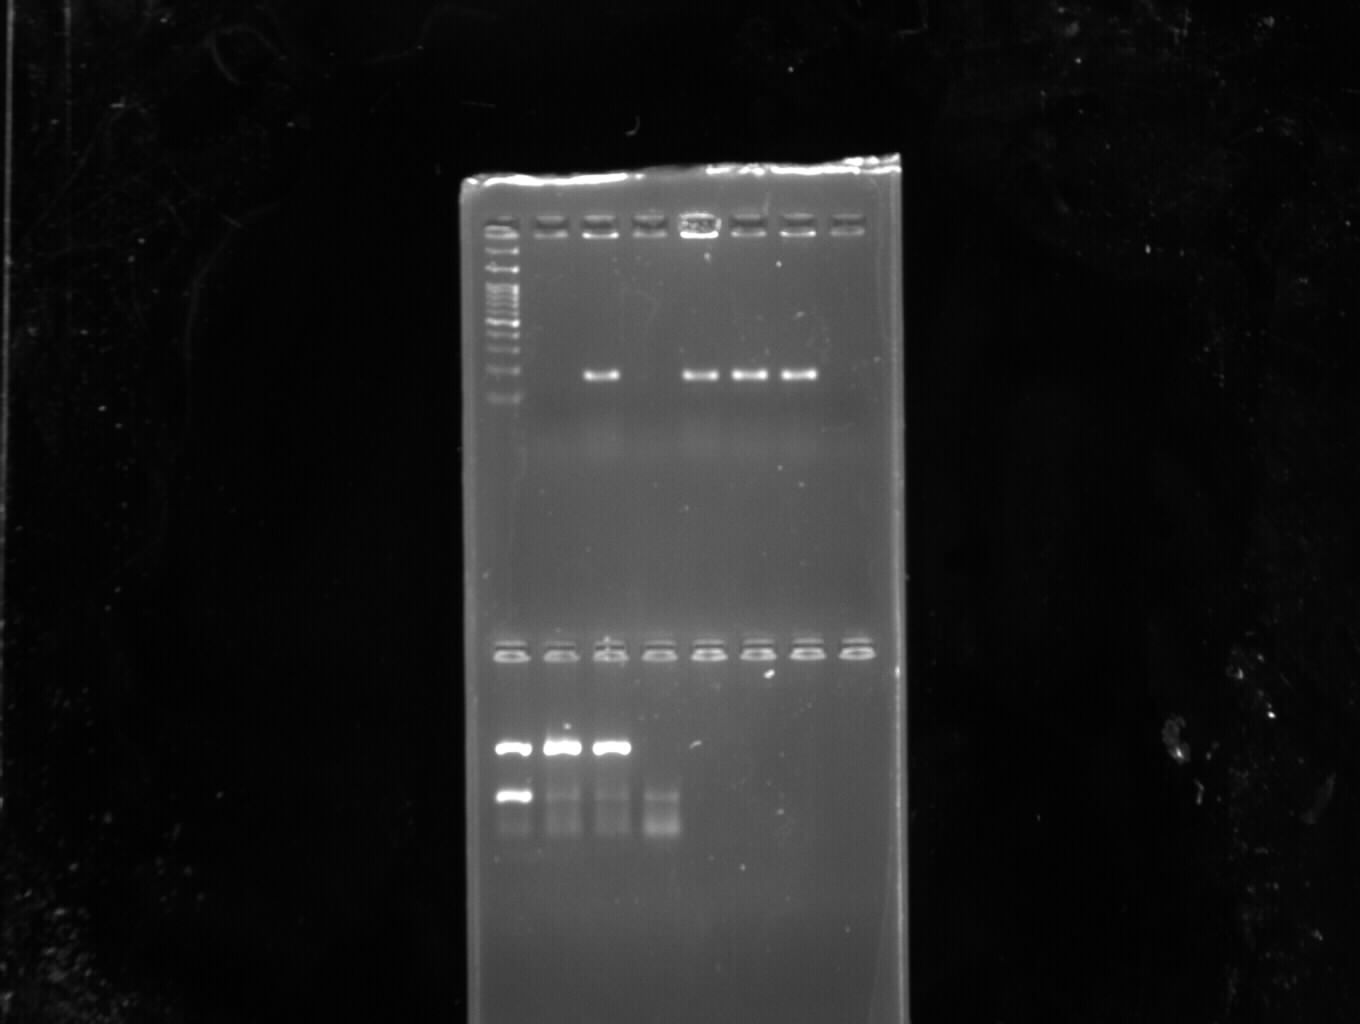


**Photograph 4: PCR amplification of *agr* III gene in staphylococcal isolates**


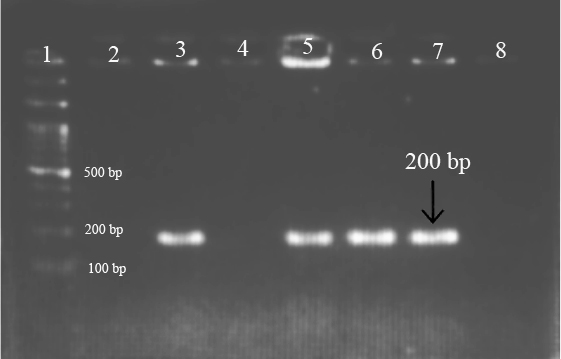


**Photograph 4: PCR amplification of *agr* III gene in staphylococcal isolates**


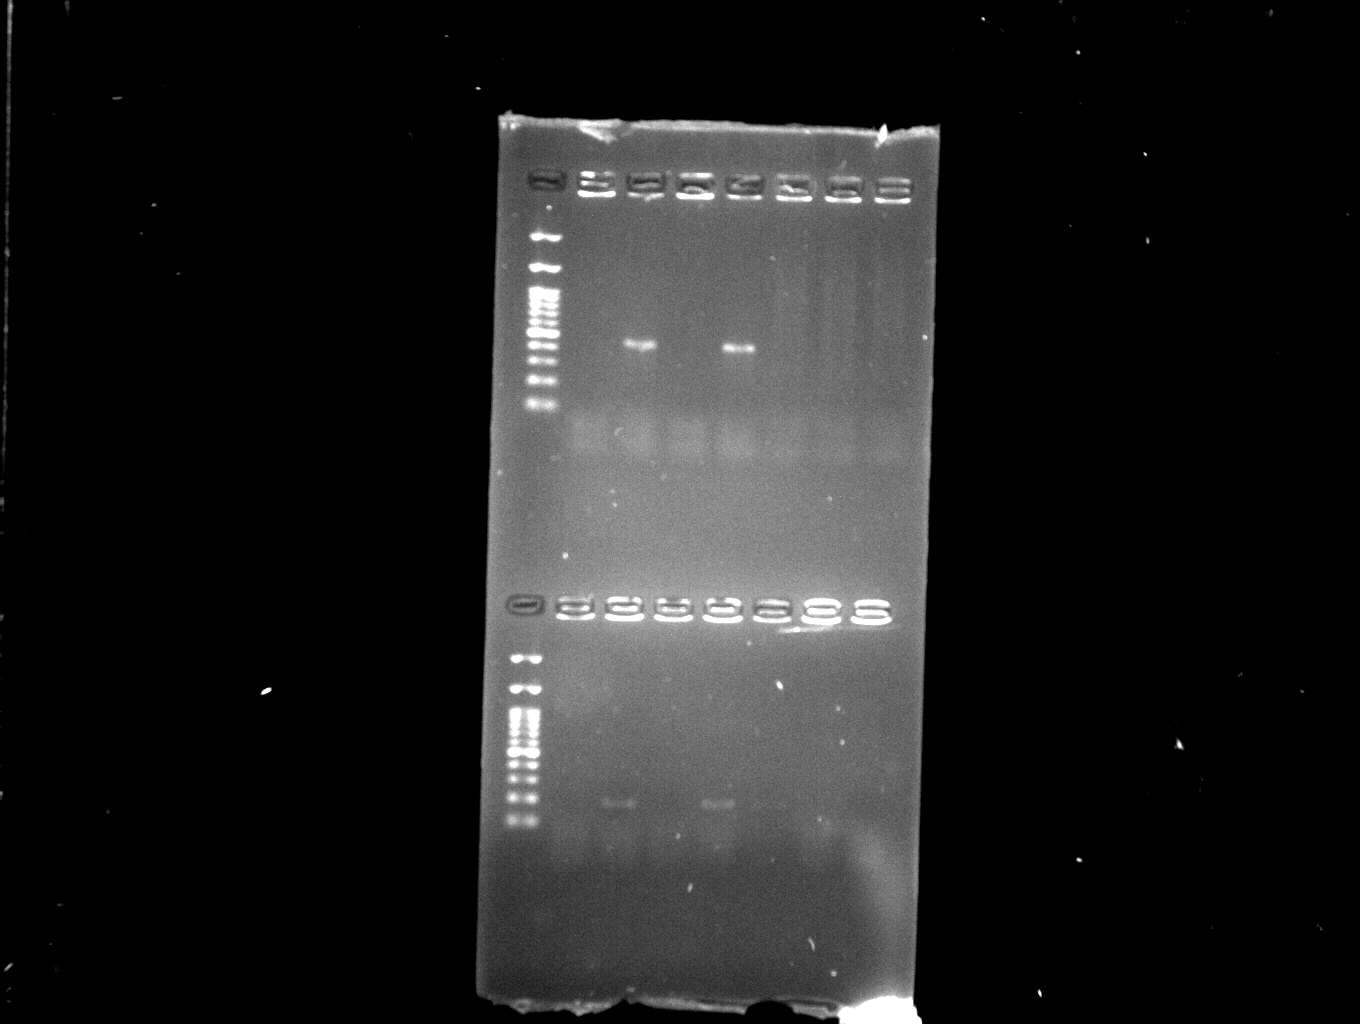


**Photograph 2: PCR amplification of *agr* I gene in staphylococcal isolates**

**
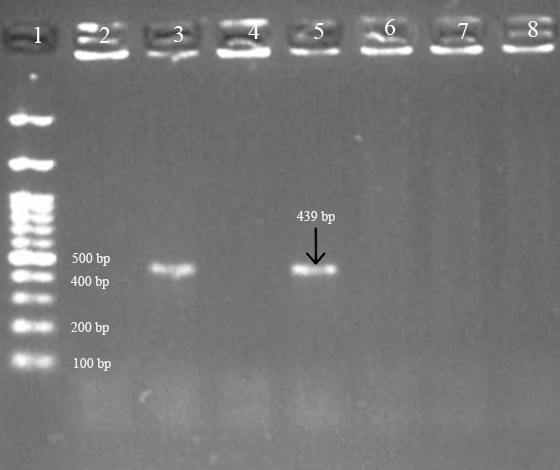
**

**Photograph 2: PCR amplification of *agr* I gene in staphylococcal isolates**


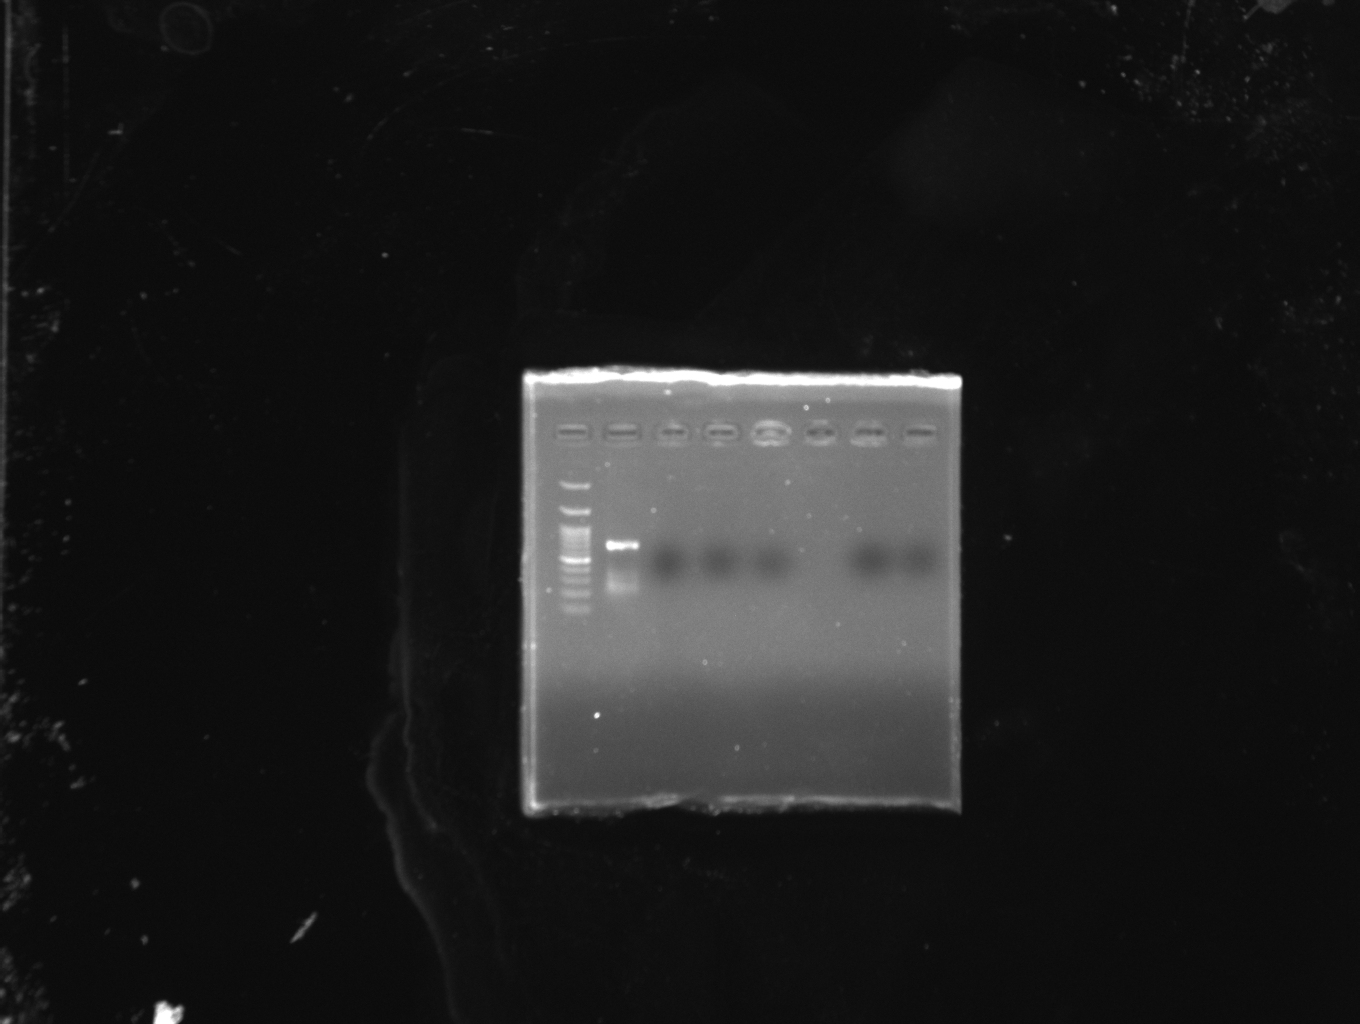


**Photograph 5: PCR amplification of *agr* IV gene in staphylococcal isolates**

**
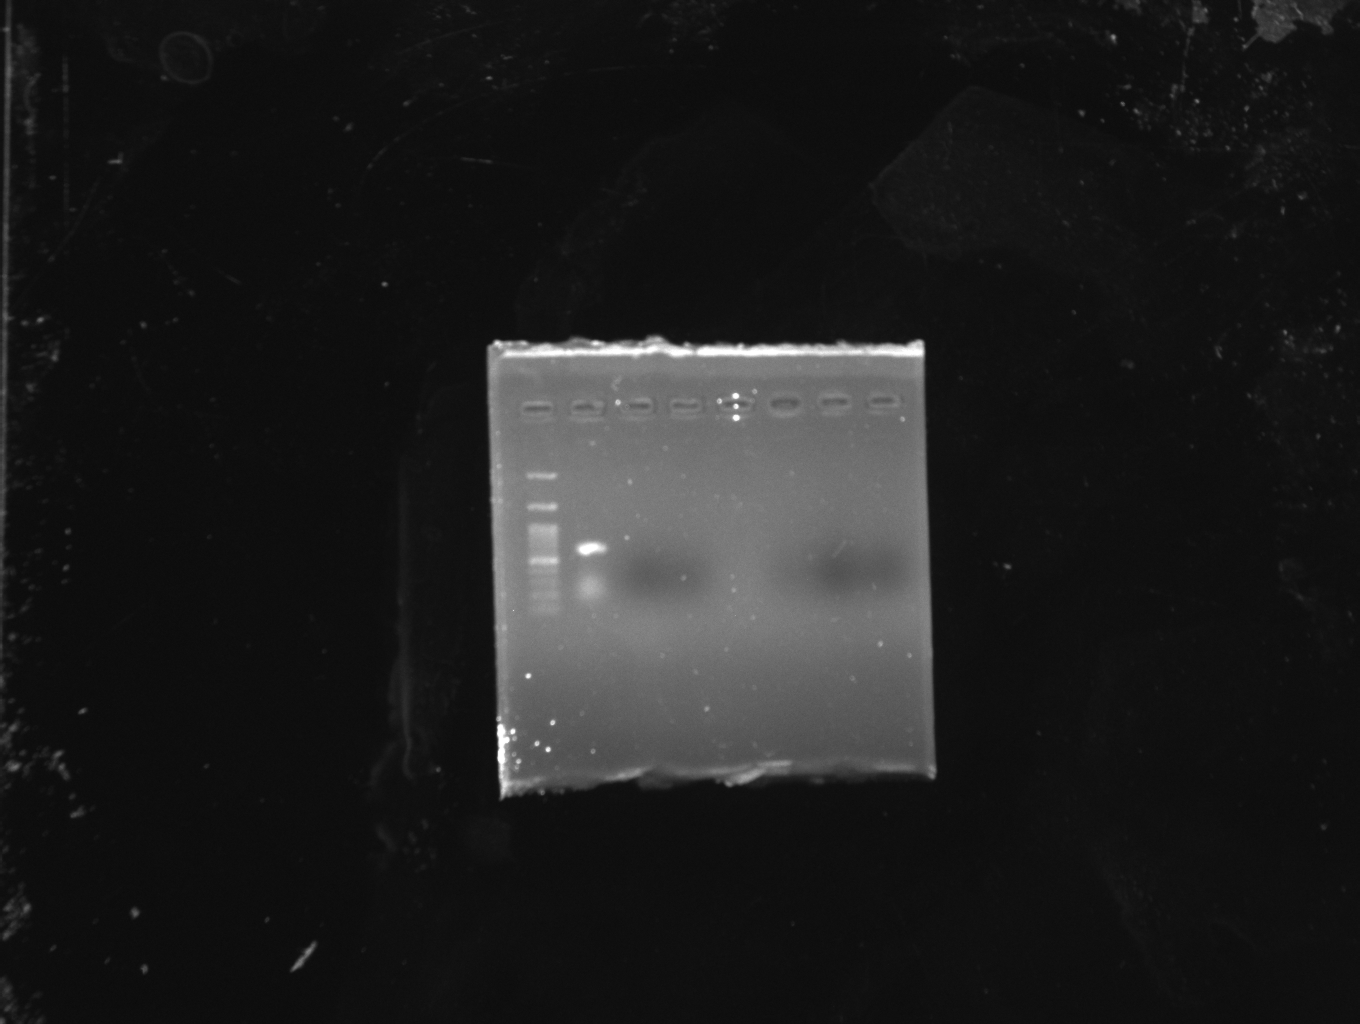
**

**Photograph 3: PCR amplification of *agr* II gene in staphylococcal isolates**


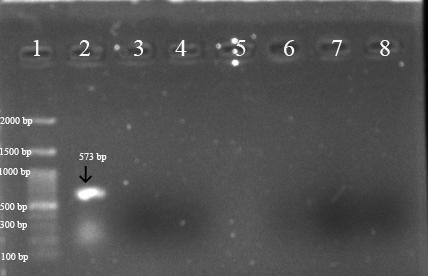


**Photograph 3: PCR amplification of *agr* II gene in staphylococcal isolates**
